# Supplementary material for: Fungus-Based MnO/Porous Carbon Nanohybrid as Efficient Laccase Mimic for Oxygen Reduction Catalysis and Hydroquinone Detection
Source: MDPI journal article supplement (doi:10.3390/nano12091596), 2022-05-08
Supplement: s1 [file s1]

## ***Supporting information***

### **Fungus Based MnO/Porous Carbon Nanohybrid as Efficient Laccase Mimic for Oxygen Reduction Catalysis and Hydroquinone Detection**

Haoran Ge, Hailong Zhang<sup>\*</sup>

School of Electrical and Automation Engineering, Nanjing Normal University,  
Nanjing 210023, China

<sup>\*</sup> Email: zhanghl@nynu.edu.cn

## Electrochemical Test

To prepare the working electrode, 3.5 mg of MnO/PC nanohybrid mixed with 1.5 mg Cabot Vulcan XC-72 carbon (Vc-72) were dispersed in a solution containing 500  $\mu\text{L}$  of mixed solution (2-propanol mixed with water ( $V_{\text{C}_3\text{H}_8\text{O}}:V_{\text{H}_2\text{O}} = 1:1$ ) and 0.5 wt % Nafion solution). The suspension was ultrasonically dispersed to form a homogeneous ink. After that, the ink was pipetted onto the GC electrode and then was naturally drying to form a thin catalyst layer on the GC electrode. The tests were conducted on a computer-controlled potentiationstat/galvanostat workstation at room temperature. The supporting electrolyte was 0.1 M KOH aqueous solution, which was purged with  $\text{N}_2$  or  $\text{O}_2$  (purity 99.995%) for at least 30 min prior to testing and maintained under  $\text{N}_2$  or  $\text{O}_2$  atmosphere during the test. Cyclic voltammograms were recorded from 0.2 to -0.8 V versus Ag/AgCl in  $\text{N}_2$  (or)  $\text{O}_2$ -saturated 0.1 M KOH electrolyte solutions with a scan rate of 20  $\text{mV s}^{-1}$ . All potentials were reported with reference to the reversible hydrogen electrode (RHE) potential scale. In 0.1  $\text{mol L}^{-1}$  KOH solution, the potential of Ag/AgCl was calibrated as +0.965 V with respect to RHE.

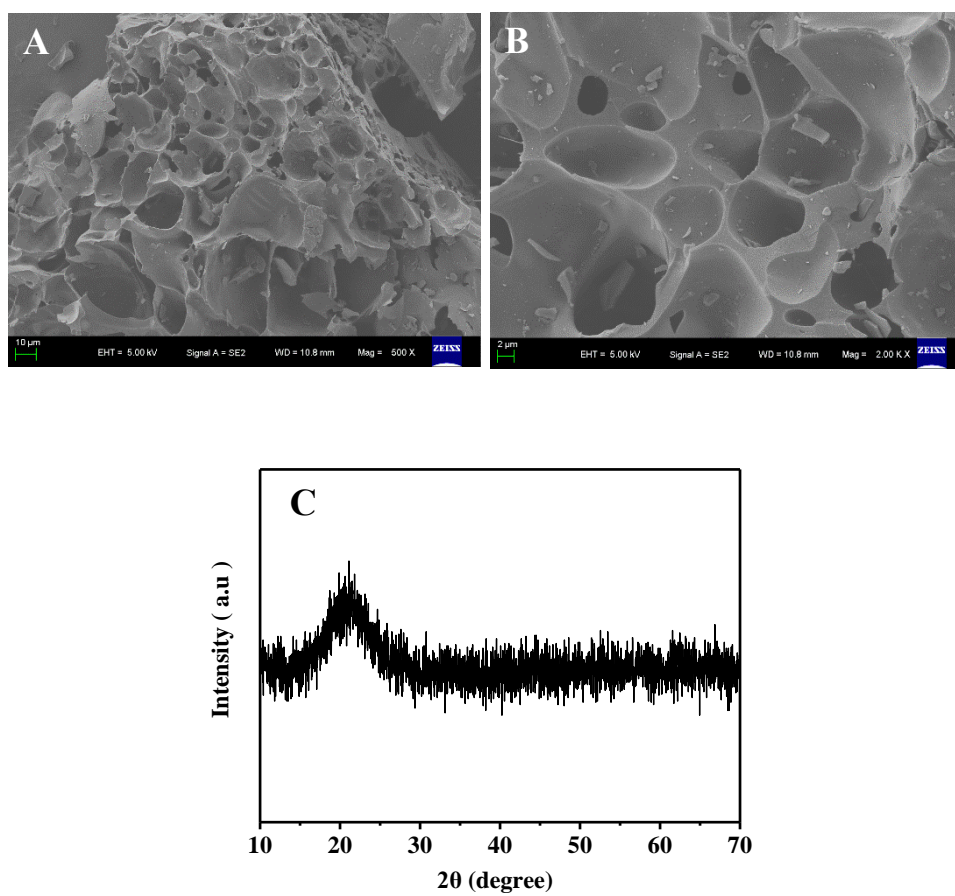

Figure S1. (A, B) SEM images of porous carbon with different magnifications. (C) XRD patterns of porous carbon.

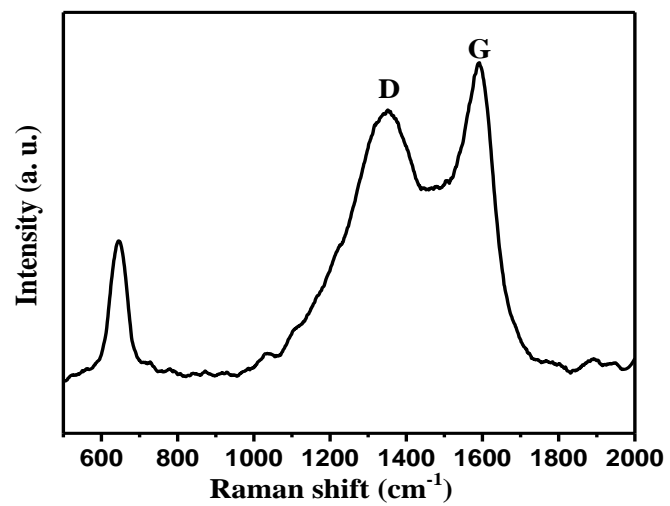

Figure S2. Raman spectra of MnO/PC nanohybrid.

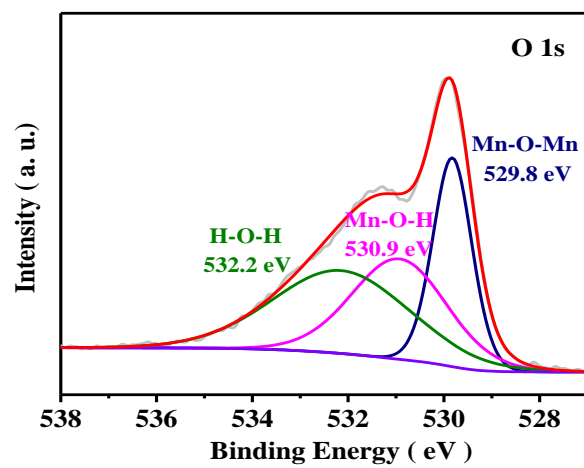

Figure S3. High-resolution O1s XPS spectra of MnO/PC nanohybrid.

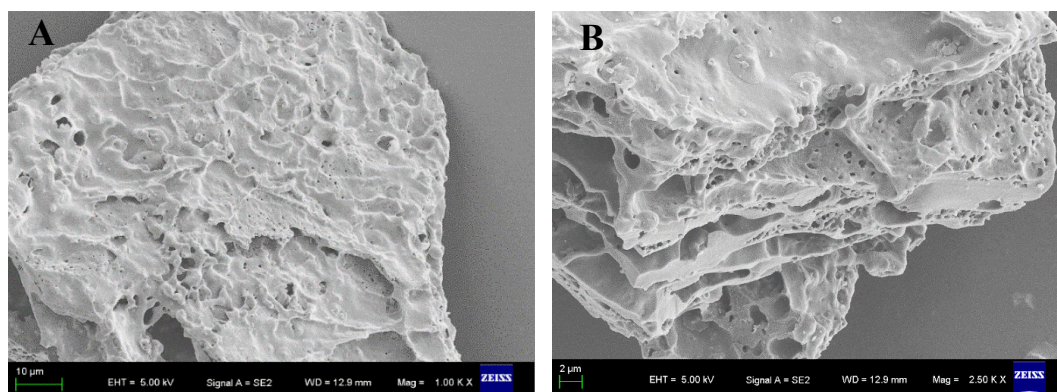

Figure S4. SEM images MnO/PC nanohybrid obtained at 700 °C with different magnifications.

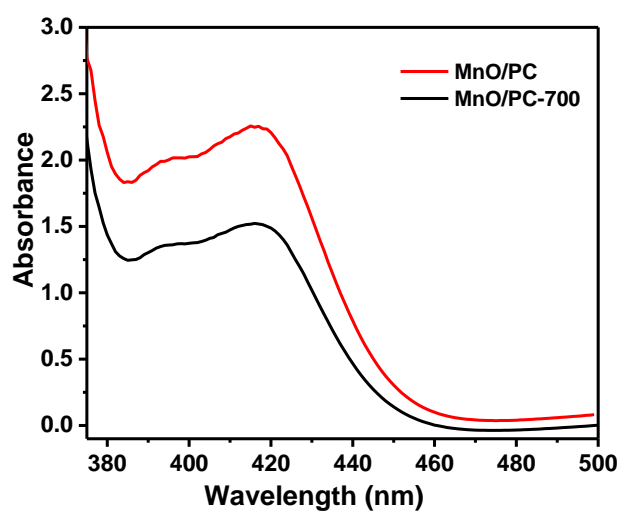

Figure S5. Typical UV-vis spectra of the oxidation of ABTS by MnO/PC nanohybrid obtained at 700 and 800 °C.

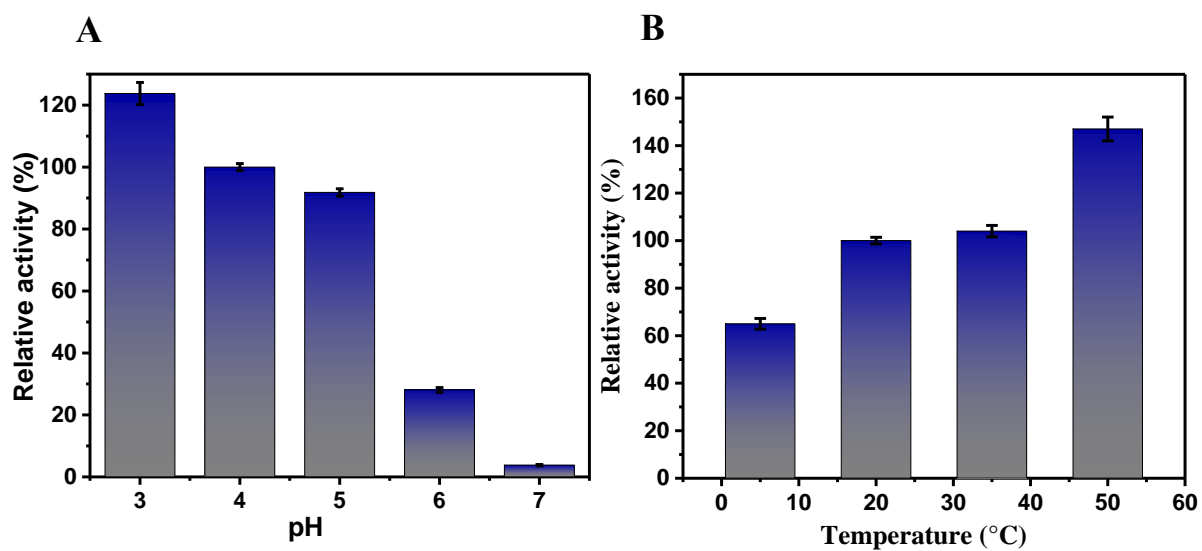

Figure S6. The influence of pH (A) and temperature (B) on the relative activity of the MnO/PC nanohybrid.



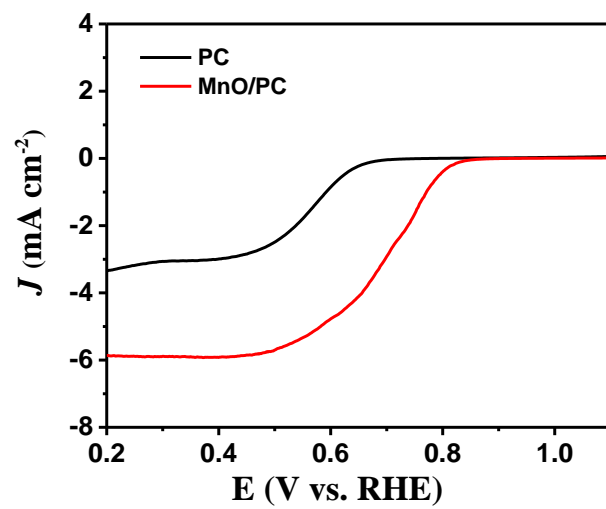

Figure S7. LSV curves of PC and MnO/PC nanohybrid at 1600 rpm in O<sub>2</sub>-saturated 0.1 M KOH.

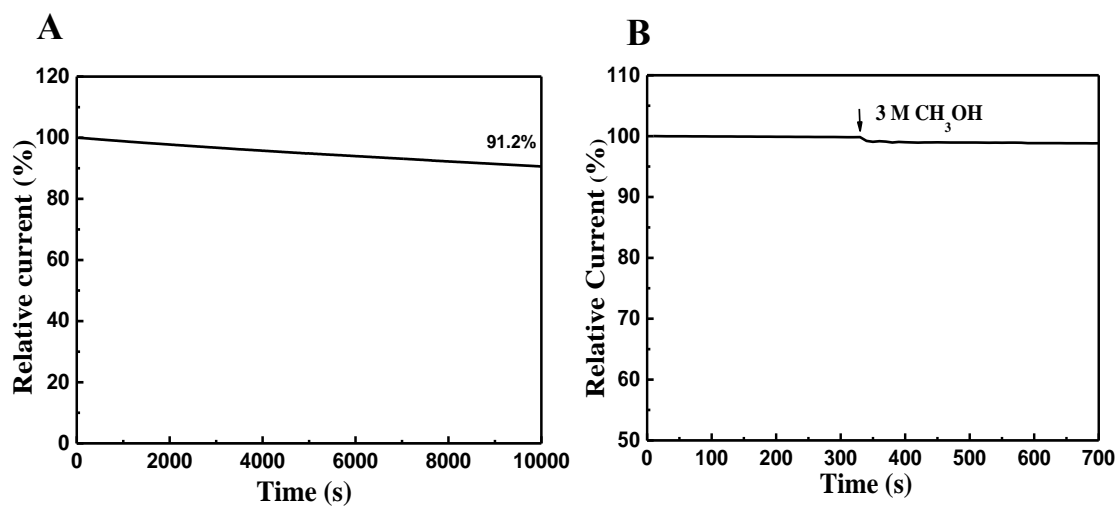

Figure S8. (A) Chronoamperometric curves of MnO/PC nanohybrid and Pt/C in O<sub>2</sub>-saturated 0.1M KOH with a constant potential 0.65 V (vs. RHE). (B) Chronoamperometric curves of MnO/PC nanohybrid by adding of 3 M methanol after 330 s in O<sub>2</sub>-saturated 0.1 M KOH with a constant potential 0.65 V (vs. RHE).

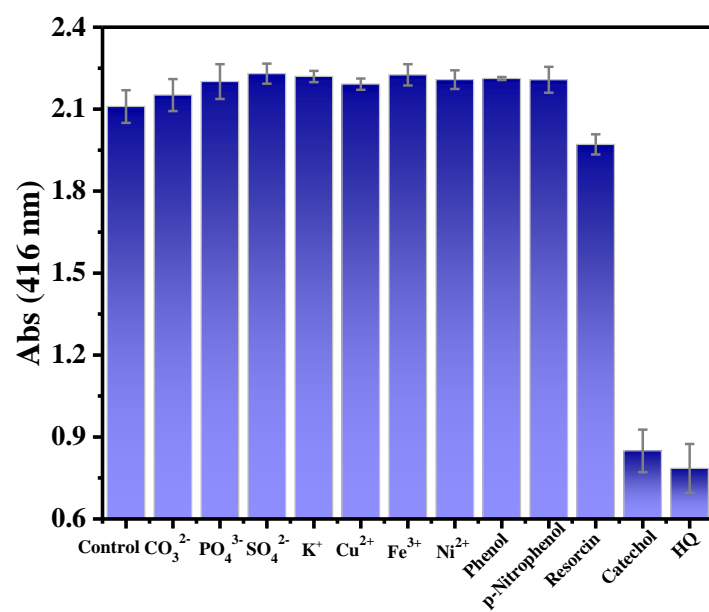

Figure S9. Effect of different phenols and ions on HQ sensing with adding the equal amount of phenols and 10-fold other compounds.

**Table S1.** Comparison of the ORR electrochemical performances of MnO/PC nanohybrid with the reported catalysts and Pt/C.

| Catalyst                    | $E_{onset}$<br>(V vs. RHE) | Electron transfer<br>number | Limiting current<br>density (mA cm <sup>-2</sup> ) | Reference |
|-----------------------------|----------------------------|-----------------------------|----------------------------------------------------|-----------|
| MnO                         | --                         | 2.18                        | 1.1                                                | 1         |
| MnO/NG                      | 0.89                       | 3.70                        | 4.17                                               | 2         |
| MnO                         | 0.70                       | --                          | 1.1                                                | 3         |
| 3D-N-RGO/MnO                | 0.83                       | 3.03                        | 1.62                                               | 3         |
| MnO                         | --                         | 2.94-3.14                   | 1.0                                                | 4         |
| MnO/RGO                     | --                         | 3.98-4.02                   | 4.72                                               | 4         |
| MnO/NC-2                    | 0.987                      | 4                           | 5.4                                                | 5         |
| CNTs@MnO                    | -                          | 3.8-4.0                     | 1.6                                                | 6         |
| CNTs@MnO <sub>x</sub>       | -                          | 3.2-3.4                     | 1.4                                                | 6         |
| Laccase-mimicking<br>Cu-DPA | 0.78                       | 3.7                         | --                                                 | 7         |
| MnO <sub>x</sub> /C         | --                         | 3.54                        | --                                                 | 8         |
| Pt/C-20%                    | 0.93                       | 3.9                         | 5.96                                               | This work |
| MnO/PC nanohybrid           | 0.83                       | 3.9                         | 5.87                                               | This work |

**Table S2.** Determination of HQ in real sample using the present colorimetric method (n= 3).

| Sample     | Added ( $\mu\text{M}$ ) | Found ( $\mu\text{M}$ ) | Recovery (%) | RSD (n = 3, %) |
|------------|-------------------------|-------------------------|--------------|----------------|
| Tap water  | 15.0                    | 15.0                    | 100.0        | 4.0            |
|            | 30.0                    | 28.8                    | 96.0         | 3.0            |
| Lake water | 15.0                    | 14.5                    | 96.7         | 2.7            |
|            | 30.0                    | 31.9                    | 106.3        | 4.6            |

## References

1. Wu, X.; Gao, X.; Xu, L.; Huang, T.; Yu J.; Wen, C.; Chen, Z.; Han, J. Mn<sub>2</sub>O<sub>3</sub> doping induced the improvement of catalytic performance for oxygen reduction of MnO. *Int. J. Hydrogen Energy* **2016**, 41, 16087-16093.
2. Arunchander, A.; Vivekanantha, M.; Peeraa, S. G.; Sahu, A. K. MnO–nitrogen doped graphene as a durable non-precious hybrid catalyst for the oxygen reduction reaction in anion exchange membrane fuel cells. *RSC Adv.* **2016**, 6, 95590–95600.
3. Chen, R.; Yan, J.; Liu, Y.; Li, J. Three-dimensional nitrogen-Doped graphene/MnO nanoparticle hybrids as a high-performance catalyst for oxygen reduction reaction. *J. Phys. Chem. C.* **2015**, 119, 8032-8037.
4. Wu, Q.; Jiang, M.; Zhang, X.; Cai, J.; Lin, S. A novel octahedral MnO/RGO composite prepared by thermal decomposition as a noble-metal free electrocatalyst for ORR. *Mater Sci.*, **2017**, 52, 6656-6669.
5. Ding, J.; Ji, S.; Wang, H.; Brett, D. J. L.; Pollet, B. J.; Wang, B. G. MnO/N-doped mesoporous carbon as advanced oxygen reduction reaction electrocatalyst for zinc–air batteries. *Chem. Eur. J.* **2019**, 25, 2868 – 2876.
6. Luo, W.; Chou, S.; Wang, J.; Zhai, Y.; Liu, H. A facile approach to synthesize stable CNTs@MnO electrocatalyst for high energy lithium oxygen batteries. *Scientific Reports* 2015, 5, 8012.
7. Edmund, C. M. T.; David, S.; Danielle, L. G.; Thomas, B. R.; Andrew, A. G. Multicopper models for the laccase active site: effect of nuclearity on electrocatalytic oxygen reduction. *Inorg. Chem.* **2014**, 53, 8505–8516.
8. Roche, I.; Chaînet, E.; Chatenet, M.; Vondrák, J. Carbon-supported manganese oxide nanoparticles as electrocatalysts for the oxygen reduction reaction (ORR) in alkaline medium: physical characterizations and ORR mechanism. *J. Phys. Chem. C* **2007**, 111, 1434-1443.
